# Supplementary material for: Negative linear compressibility and strong enhancement of emission in Eu[Ag(CN)2]3·3H2O under pressure
Source: Royal Society of Chemistry journal article supplement (doi:10.1039/d3cp05259a), 2023-12-12
Supplement: d3cp05259a1.pdf [file d3cp05259a1.pdf]

## Supplementary Information

### Negative linear compressibility and strong enhancement of emission in Eu[Ag(CN)<sub>2</sub>]<sub>3</sub>·3H<sub>2</sub>O under pressure

Yu Liu,<sup>‡a</sup> Boyang Fu,<sup>‡a</sup> Min Wu,<sup>b</sup> Weilong He,<sup>a</sup> Donghua Liu,<sup>\*a</sup> Fuyang Liu,<sup>c</sup> Luhong Wang,<sup>c</sup>  
Haozhe Liu,<sup>c</sup> Kai Wang,<sup>b</sup> and Weizhao Cai<sup>\*a</sup>

<sup>a</sup> School of Materials and Energy, University of Electronic Science and Technology of China, Chengdu 611731,  
Sichuan, China

<sup>b</sup> Shandong Key Laboratory of Optical Communication Science and Technology, School of Physics Science and  
Information Technology, Liaocheng University, Liaocheng 252000, China

<sup>c</sup> Center for High Pressure Science and Technology Advanced Research, Haidian, Beijing 100094, China

Corresponding authors:

\*dhliu@uestc.edu.cn

\*wzhcai@uestc.edu.cn

<sup>‡</sup>These authors contributed equally.

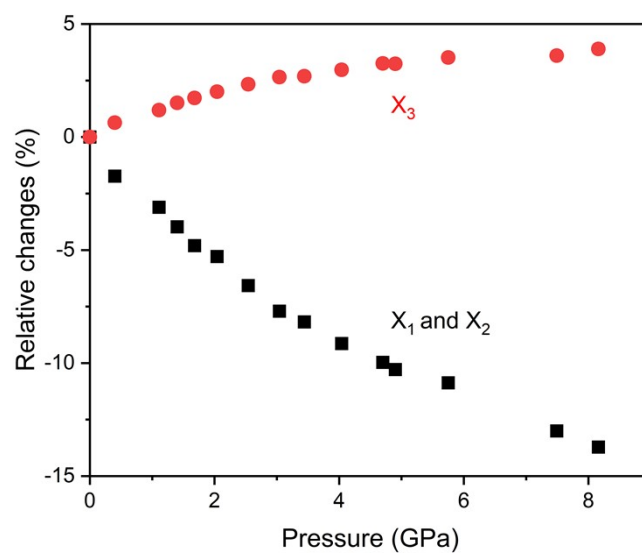

**Figure S1.** The changes of principal axes  $X_1$ ,  $X_2$  and  $X_3$  of phase I as a function of pressure.

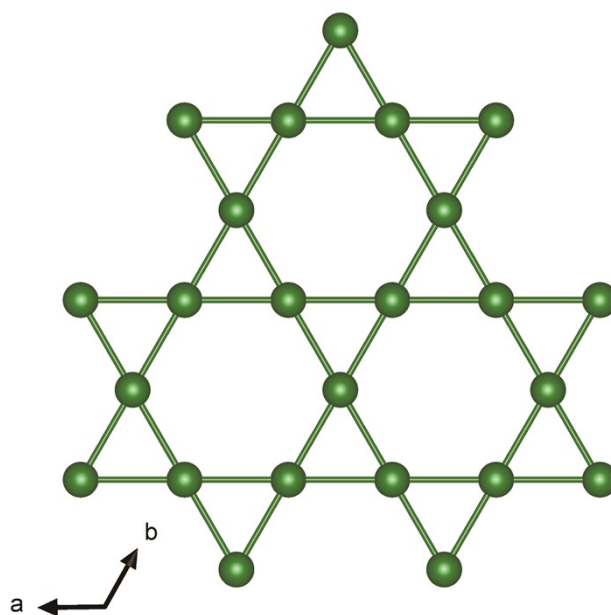

**Figure S2.** The Kagome net of Ag atoms in  $\text{Eu}[\text{Ag}(\text{CN})_2]_3 \cdot 3\text{H}_2\text{O}$ . Each Ag atom is connected to four other Ag atoms around it by argentophilic interactions.

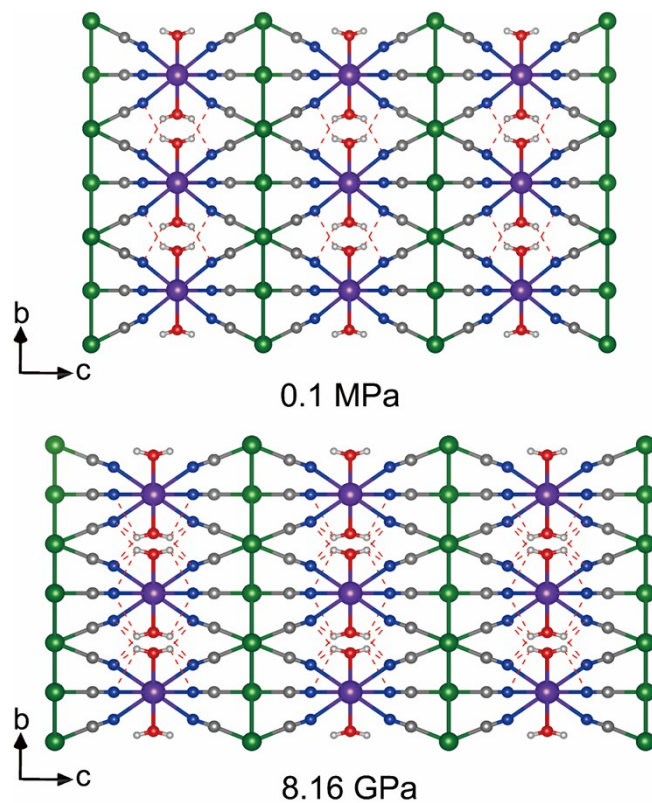

**Figure S3.** Crystal structure of  $\text{Eu}[\text{Ag}(\text{CN})_2]_3 \cdot 3\text{H}_2\text{O}$ . The O-H $\cdots$ N hydrogen bonds are represented by red dashed lines. Colour code of atoms: Eu purple, Ag green, N blue, C gray, O red, H light grey.

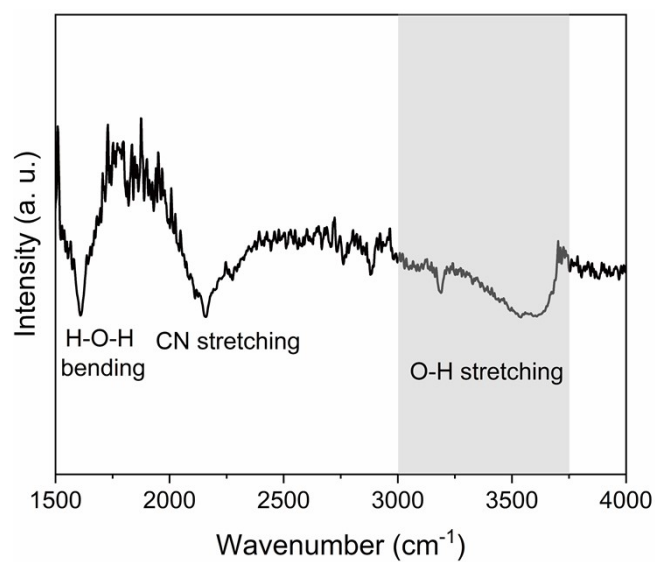

**Figure S4.** FT-IR spectra of  $\text{Eu}[\text{Ag}(\text{CN})_2]_3 \cdot 3\text{H}_2\text{O}$  at ambient pressure.

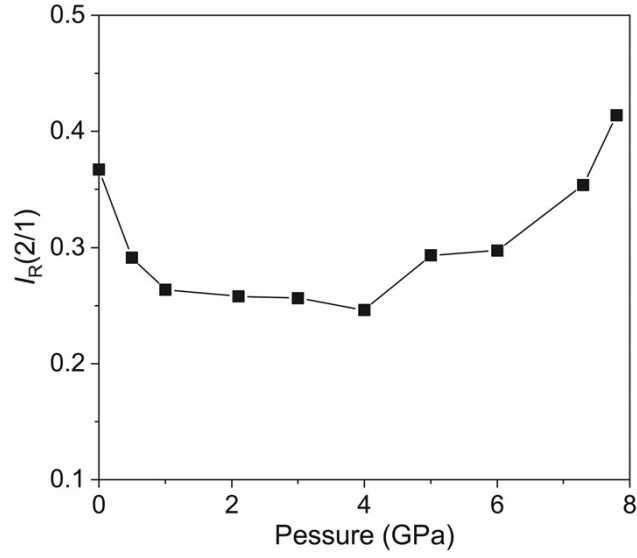

**Figure S5.** Evolution of intensity ratios of  ${}^5D_0 \rightarrow {}^7F_2$  to  ${}^5D_0 \rightarrow {}^7F_1$ ,  $I_R(2/1)$  at different pressures.

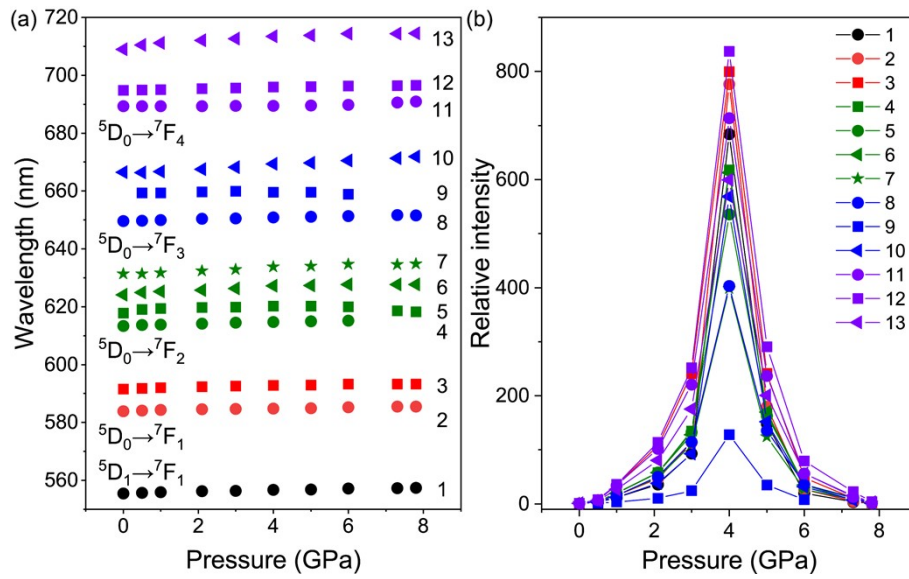

**Figure S6.** (a) The plot of wavelength of  $\text{Eu}[\text{Ag}(\text{CN})_2]_3 \cdot 3\text{H}_2\text{O}$  single crystal as a function of pressure. (b) Relative intensity to ambient pressure data at different pressures.

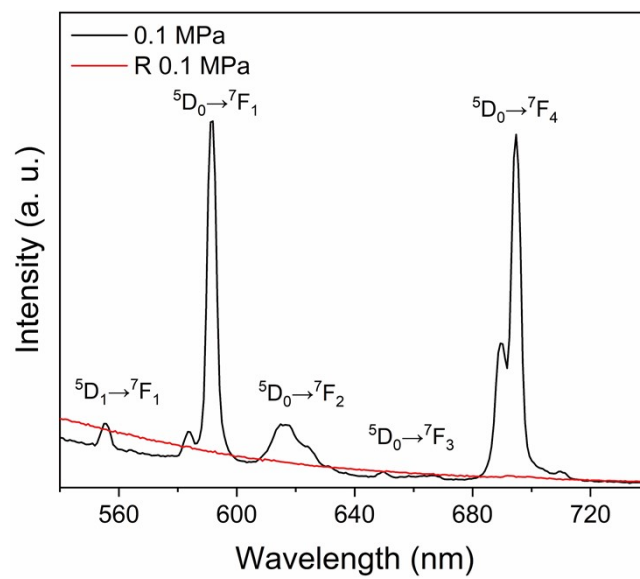

**Figure S7.** The emission spectra of Eu[Ag(CN)<sub>2</sub>]<sub>3</sub>·3H<sub>2</sub>O single crystal under ambient pressure and released to ambient pressure.

**Table S1.** Selected crystallographic data of  $\text{Eu}[\text{Ag}(\text{CN})_2]_3 \cdot 3\text{H}_2\text{O}$  single crystal compressed in ME mixture at RT.

| Pressure (GPa)                                       | 0.0001 <sup>a</sup>  | 0.40                 | 1.11                 | 1.40                 | 1.68                 |
|------------------------------------------------------|----------------------|----------------------|----------------------|----------------------|----------------------|
| CCDC                                                 | 2303078              | 2303077              | 2303079              | 2303080              | 2303081              |
| Crystal system                                       | hexagonal            | hexagonal            | hexagonal            | hexagonal            | hexagonal            |
| Space group                                          | $P6_3/mcm$           | $P6_3/mcm$           | $P6_3/mcm$           | $P6_3/mcm$           | $P6_3/mcm$           |
| Phase                                                | I                    | I                    | I                    | I                    | I                    |
| Radiation type                                       | MoK $\alpha$         | AgK $\alpha$         | AgK $\alpha$         | AgK $\alpha$         | AgK $\alpha$         |
| Crystal size (mm)                                    | 0.17×0.17×0.12       | 0.17×0.15×0.10       | 0.18×0.15×0.12       | 0.16×0.12×0.08       | 0.17×0.15×0.09       |
| $a$ (Å)                                              | 6.6933(4)            | 6.5784(4)            | 6.4884(3)            | 6.4324(4)            | 6.3792(2)            |
| $b$ (Å)                                              | 6.6933(4)            | 6.5784(4)            | 6.4884(3)            | 6.4324(4)            | 6.3792(2)            |
| $c$ (Å)                                              | 18.4866(11)          | 18.6044(9)           | 18.7079(9)           | 18.7687(9)           | 18.8082(8)           |
| $\alpha$ (°)                                         | 90                   | 90                   | 90                   | 90                   | 90                   |
| $\beta$ (°)                                          | 90                   | 90                   | 90                   | 90                   | 90                   |
| $\gamma$ (°)                                         | 120                  | 120                  | 120                  | 120                  | 120                  |
| $V$ (Å <sup>3</sup> )                                | 717.25(10)           | 697.25(9)            | 682.07(7)            | 672.53(9)            | 662.84(5)            |
| $Z$                                                  | 2                    | 2                    | 2                    | 2                    | 2                    |
| $\rho_{\text{calc}}$ (g/cm <sup>3</sup> )            | 3.175                | 3.266                | 3.339                | 3.386                | 3.436                |
| $\mu$ (mm <sup>-1</sup> )                            | 4.432                | 4.559                | 4.660                | 4.675                | 4.743                |
| Index ranges                                         | $-10 \leq h \leq 11$ | $-6 \leq h \leq 6$   | $-5 \leq h \leq 5$   | $-4 \leq h \leq 4$   | $-9 \leq h \leq 9$   |
|                                                      | $-11 \leq k \leq 9$  | $-7 \leq k \leq 7$   |
|                                                      | $-28 \leq l \leq 27$ | $-28 \leq l \leq 29$ | $-28 \leq l \leq 28$ | $-28 \leq l \leq 28$ | $-21 \leq l \leq 21$ |
| $R_{\text{int}}$                                     | 0.0351               | 0.0392               | 0.0341               | 0.0299               | 0.0823               |
| GOOF                                                 | 1.249                | 1.171                | 1.043                | 1.087                | 1.134                |
| $R_1/wR_2$ [ $I > 2\sigma(I)$ ] <sup>b</sup>         | 0.0279/0.0518        | 0.0218/0.0498        | 0.0164/0.0372        | 0.0172/0.0383        | 0.0359/0.1033        |
| $R_1/wR_2$ [all data]                                | 0.0384/0.0607        | 0.0267/0.0524        | 0.0207/0.0394        | 0.0217/0.0410        | 0.0511/0.1033        |
| Largest peak/hole (e <sup>-</sup> ·Å <sup>-3</sup> ) | 1.75/-1.38           | 0.46/-0.90           | 0.27/-0.27           | 0.48/-0.69           | 1.51/-2.69           |

Table S1 (continued)

| Pressure (GPa)                                      | 2.04                      | 2.54                      | 3.04                      | 3.44                      | 4.04                      |
|-----------------------------------------------------|---------------------------|---------------------------|---------------------------|---------------------------|---------------------------|
| CCDC                                                | 2303082                   | 2303083                   | 2303084                   | 2303085                   | 2303086                   |
| Crystal system                                      | hexagonal                 | hexagonal                 | hexagonal                 | hexagonal                 | hexagonal                 |
| Space group                                         | <i>P6<sub>3</sub>/mcm</i> | <i>P6<sub>3</sub>/mcm</i> | <i>P6<sub>3</sub>/mcm</i> | <i>P6<sub>3</sub>/mcm</i> | <i>P6<sub>3</sub>/mcm</i> |
| Phase                                               | I                         | I                         | I                         | I                         | I                         |
| Radiation type                                      | AgK $\alpha$              |
| Crystal size (mm)                                   | 0.15×0.13×0.12            | 0.17×0.14×0.12            | 0.16×0.15×0.10            | 0.15×0.15×0.07            | 0.18×0.15×0.12            |
| <i>a</i> (Å)                                        | 6.3456(17)                | 6.2669(5)                 | 6.1962(4)                 | 6.1668(10)                | 6.1073(11)                |
| <i>b</i> (Å)                                        | 6.3456(17)                | 6.2669(5)                 | 6.1962(4)                 | 6.1668(10)                | 6.1073(11)                |
| <i>c</i> (Å)                                        | 18.861(4)                 | 18.9227(16)               | 18.9835(13)               | 18.993(3)                 | 19.045(3)                 |
| $\alpha$ (°)                                        | 90                        | 90                        | 90                        | 90                        | 90                        |
| $\beta$ (°)                                         | 90                        | 90                        | 90                        | 90                        | 90                        |
| $\gamma$ (°)                                        | 120                       | 120                       | 120                       | 120                       | 120                       |
| <i>V</i> (Å <sup>3</sup> )                          | 657.7(4)                  | 643.6(12)                 | 631.19(9)                 | 625.5(2)                  | 615.2(2)                  |
| <i>Z</i>                                            | 2                         | 2                         | 2                         | 2                         | 2                         |
| $\rho_{\text{calc}}$ (g/cm <sup>3</sup> )           | 3.460                     | 3.538                     | 3.608                     | 3.642                     | 3.702                     |
| $\mu$ (mm <sup>-1</sup> )                           | 4.829                     | 4.885                     | 5.036                     | 5.083                     | 5.167                     |
| Index ranges                                        | $-3 \leq h \leq 3$        | $-9 \leq h \leq 9$        | $-9 \leq h \leq 9$        | $-8 \leq h \leq 8$        | $-4 \leq h \leq 4$        |
|                                                     | $-5 \leq k \leq 5$        | $-7 \leq k \leq 7$        | $-7 \leq k \leq 7$        | $-4 \leq k \leq 4$        | $-7 \leq k \leq 8$        |
|                                                     | $-29 \leq l \leq 29$      | $-22 \leq l \leq -22$     | $-22 \leq l \leq 22$      | $-27 \leq l \leq 28$      | $-28 \leq l \leq 28$      |
| $R_{\text{int}}$                                    | 0.0723                    | 0.0606                    | 0.0436                    | 0.0965                    | 0.1027                    |
| GOOF                                                | 1.139                     | 1.123                     | 1.174                     | 1.071                     | 1.086                     |
| $R_1/wR_2$ [ $I > 2\sigma(I)$ ] <sup>b</sup>        | 0.0476/0.0974             | 0.0315/0.0703             | 0.0312/0.0671             | 0.0420/0.0814             | 0.0444/0.0752             |
| $R_1/wR_2$ [all data]                               | 0.0654/0.1061             | 0.0408/0.0753             | 0.0393/0.0715             | 0.0871/0.0952             | 0.0863/0.0905             |
| Largest peak/hole (e <sup>-</sup> Å <sup>-3</sup> ) | 1.48/-1.85                | 1.54/-1.38                | 0.61/-0.52                | 1.01/-1.44                | 1.49/-0.98                |

Table S1 (continued)

| Pressure (GPa)                            | 4.70                      | 5.75                      | 7.49                      | 8.16                      |
|-------------------------------------------|---------------------------|---------------------------|---------------------------|---------------------------|
| CCDC                                      | 2303087                   | 2303088                   | 2303089                   | 2303090                   |
| Crystal system                            | hexagonal                 | hexagonal                 | hexagonal                 | hexagonal                 |
| Space group                               | <i>P6<sub>3</sub>/mcm</i> | <i>P6<sub>3</sub>/mcm</i> | <i>P6<sub>3</sub>/mcm</i> | <i>P6<sub>3</sub>/mcm</i> |
| Phase                                     | I                         | I                         | I                         | I                         |
| Radiation type                            | AgK $\alpha$              | AgK $\alpha$              | AgK $\alpha$              | AgK $\alpha$              |
| Crystal size (mm)                         | 0.14×0.12×0.08            | 0.17×0.13×0.09            | 0.15×0.13×0.10            | 0.15×0.14×0.12            |
| <i>a</i> (Å)                              | 6.0562(5)                 | 6.001(2)                  | 5.8722(6)                 | 5.8288(3)                 |
| <i>b</i> (Å)                              | 6.0562(5)                 | 6.001(2)                  | 5.8722(6)                 | 5.8288(3)                 |
| <i>c</i> (Å)                              | 19.0992(18)               | 19.149(8)                 | 19.171(2)                 | 19.214(2)                 |
| $\alpha$ (°)                              | 90                        | 90                        | 90                        | 90                        |
| $\beta$ (°)                               | 90                        | 90                        | 90                        | 90                        |
| $\gamma$ (°)                              | 120                       | 120                       | 120                       | 120                       |
| <i>V</i> (Å <sup>3</sup> )                | 606.66(12)                | 597.2(5)                  | 572.50(14)                | 565.35(8)                 |
| <i>Z</i>                                  | 2                         | 2                         | 2                         | 2                         |
| $\rho_{\text{calc}}$ (g/cm <sup>3</sup> ) | 3.754                     | 3.813                     | 3.978                     | 4.028                     |
| $\mu$ (mm <sup>-1</sup> )                 | 5.240                     | 5.265                     | 5.492                     | 5.561                     |
| Index ranges                              | $-9 \leq h \leq 9$        | $-9 \leq h \leq 9$        | $-8 \leq h \leq 8$        | $-8 \leq h \leq 8$        |
|                                           | $-3 \leq k \leq 3$        | $-7 \leq k \leq 8$        | $-8 \leq k \leq 8$        | $-6 \leq k \leq 6$        |
|                                           | $-22 \leq l \leq 22$      | $-17 \leq l \leq 15$      | $-21 \leq l \leq 20$      | $-16 \leq l \leq 16$      |
| $R_{\text{int}}$                          | 0.0464                    | 0.4479                    | 0.0910                    | 0.0651                    |
| GOOF                                      | 1.111                     | 1.141                     | 1.043                     | 1.024                     |
| $R_1/wR_2 [I > 2\sigma(I)]^b$             | 0.0311/0.0695             | 0.0325/0.0733             | 0.0482 /0.1193            | 0.0464/0.1125             |
| $R_1/ wR_2$ [all data]                    | 0.0399/0.0757             | 0.0413/0.0798             | 0.0869/0.1400             | 0.0815/0.1325             |
| Largest peak/hole (e·Å <sup>-3</sup> )    | 0.92/-1.31                | 0.97/-1.48                | 1.20/-1.34                | 1.52/-1.08                |



Table S1 (continued)

| Pressure (GPa)             | 8.40 <sup>c</sup>         | 8.88 <sup>c</sup>         | 9.34 <sup>c</sup>         | 10.10 <sup>c</sup>        | 10.60 <sup>c</sup>        |
|----------------------------|---------------------------|---------------------------|---------------------------|---------------------------|---------------------------|
| Crystal system             | hexagonal                 | hexagonal                 | hexagonal                 | hexagonal                 | hexagonal                 |
| Space group                | <i>P6<sub>3</sub>/mcm</i> | <i>P6<sub>3</sub>/mcm</i> | <i>P6<sub>3</sub>/mcm</i> | <i>P6<sub>3</sub>/mcm</i> | <i>P6<sub>3</sub>/mcm</i> |
| Phase                      | II                        | II                        | II                        | II                        | II                        |
| Radiation type             | AgK $\alpha$              |
| Crystal size (mm)          | 0.17×0.14×0.05            | 0.14×0.14×0.06            | 0.16×0.13×0.09            | 0.15×0.14×0.10            | 0.15×0.14×0.12            |
| <i>a</i> (Å)               | 5.891(5)                  | 5.862(4)                  | 5.835(2)                  | 5.812(5)                  | 5.791(5)                  |
| <i>b</i> (Å)               | 5.891(5)                  | 5.862(4)                  | 5.835(2)                  | 5.812(5)                  | 5.791(5)                  |
| <i>c</i> (Å)               | 17.985(13)                | 18.051(19)                | 18.074(9)                 | 18.051(5)                 | 18.032(19)                |
| $\alpha$ (°)               | 90                        | 90                        | 90                        | 90                        | 90                        |
| $\beta$ (°)                | 90                        | 90                        | 90                        | 90                        | 90                        |
| $\gamma$ (°)               | 120                       | 120                       | 120                       | 120                       | 120                       |
| <i>V</i> (Å <sup>3</sup> ) | 540.4(8)                  | 537.2(7)                  | 532.9(4)                  | 528.1(5)                  | 523.5(8)                  |
| <i>Z</i>                   | 2                         | 2                         | 2                         | 2                         | 2                         |

[a] Ambient pressure data were collected with MoK $\alpha$  ( $\lambda = 0.71073$  Å) radiation, other high pressure data were collected with AgK $\alpha$  radiation ( $\lambda = 0.56086$  Å)

[b]  $R_1 = \sum ||F_o| - |F_c|| / \sum |F_o|$  for  $F_o^2 > 2\sigma(F_o^2)$ ;  $wR_2 = \sum [w(F_o^2 - F_c^2)] / \sum [w(F_o^2)^2]^{1/2}$ , where  $w = 1 / [\sigma^2 F_o^2 + (A P)^2 + B P]$ , and  $P = (F_o^2 + 2F_c^2) / 3$

[c] Due to low quality of the crystal data, only lattice parameters were obtained.

**Table S2.** Principal axes of the strain tensor and their mean linear compressibility coefficients of Eu[Ag(CN)<sub>2</sub>]<sub>3</sub>·3H<sub>2</sub>O-I (0–8.16 GPa) (TPa<sup>-1</sup>, ×10<sup>-3</sup> GPa<sup>-1</sup>).

| Axes           | eigenvalue | Direction |          |          |
|----------------|------------|-----------|----------|----------|
|                |            | <i>a</i>  | <i>b</i> | <i>c</i> |
| X <sub>1</sub> | 14.63(5)   | 0.7071    | -0.7071  | 0        |
| X <sub>2</sub> | 14.63(5)   | 0.7071    | 0.7071   | 0        |
| X <sub>3</sub> | -4.2(1)    | 0         | 0        | -1       |
| V              | 25.6(15)   |           |          |          |

**Table S3.** Assignments of Raman spectra of Eu[Ag(CN)<sub>2</sub>]<sub>3</sub>·3H<sub>2</sub>O single crystal.

| Phase I<br>0.1 MPa | Raman shift<br>(cm <sup>-1</sup> ) | Assignments              | Phase II<br>(8.30 GPa) | Raman shift<br>(cm <sup>-1</sup> ) | Assignments              |
|--------------------|------------------------------------|--------------------------|------------------------|------------------------------------|--------------------------|
| $\nu_1$            | 119.80 w                           | Ag-Ag stretch            | $\nu_1$                | 163.60 w                           | Ag-Ag stretch            |
| $\nu_2$            | 202.90 w                           | Eu-O stretch             | $\nu_2$                | 250.40 w                           | Eu-O stretch             |
| $\nu_3$            | 273.80 w                           | Ag-CN bend<br>(in plane) | $\nu_3$                | 276.10 w                           | Ag-CN bend<br>(in plane) |
| $\nu_4$            | 294.90 m                           | Ag-CN bend<br>(in plane) | $\nu_4$                | 305.50 s                           | Ag-CN bend<br>(in plane) |
| $\nu_5$            | 414.30 vw                          | Ag-C stretch             |                        |                                    |                          |
| $\nu_6$            | 805.88 s                           | Eu-O stretch             | $\nu_6$                | 771.43 m                           | Eu-O stretch             |
| $\nu_7$            | 819.34 s                           | Eu-O stretch             | $\nu_7$                | 828.90 m                           | Eu-O stretch             |
| $\nu_8$            | 833.53 s                           | Eu-O stretch             | $\nu_8$                | 885.58 m                           | Eu-O stretch             |
| $\nu_9$            | 2162.90 w                          | CN stretch               | $\nu_9$                | 2194.10 w                          | CN stretch               |
| $\nu_{10}$         | 3399.30 m                          | O-H stretch              | $\nu_{10}$             | 3431.30 m                          | O-H stretch              |
| $\nu_{11}$         | 3422.80 m                          | O-H stretch              | $\nu_{11}$             | 3446.50 m                          | O-H stretch              |

s = strong; m = medium; vw = very weak;

**Table S4.** Assignments of emission bands of Eu[Ag(CN)<sub>2</sub>]<sub>3</sub>·3H<sub>2</sub>O single crystal at ambient pressure.

| Emission band | $\lambda$ (nm) | assignment                                                | $\Delta\nu/\Delta p$ (nm/GPa) <sup>a</sup> |
|---------------|----------------|-----------------------------------------------------------|--------------------------------------------|
| 1             | 555.51         | <sup>5</sup> D <sub>1</sub> → <sup>7</sup> F <sub>1</sub> | 0.31±0.02                                  |
| 2             | 583.97         | <sup>5</sup> D <sub>0</sub> → <sup>7</sup> F <sub>1</sub> | 0.21±0.03                                  |
| 3             | 591.53         |                                                           | 0.32±0.02                                  |
| 4             | 613.38         |                                                           | 0.35±0.02                                  |
| 5             | 617.77         | <sup>5</sup> D <sub>0</sub> → <sup>7</sup> F <sub>2</sub> | 0.50±0.14                                  |
| 6             | 624.17         |                                                           | 0.68±0.06                                  |
| 7             | 631.41         |                                                           | 0.59±0.05                                  |
| 8             | 649.68         |                                                           | 0.31±0.02                                  |
| 9             | 659.39         | <sup>5</sup> D <sub>0</sub> → <sup>7</sup> F <sub>3</sub> | 0.10±0.08                                  |
| 10            | 666.49         |                                                           | 0.74±0.07                                  |
| 11            | 689.40         |                                                           | 0.04±0.01                                  |
| 12            | 694.75         | <sup>5</sup> D <sub>0</sub> → <sup>7</sup> F <sub>4</sub> | 0.30±0.01                                  |
| 13            | 708.94         |                                                           | 1.02±0.14                                  |

<sup>a</sup> Linear fit of the emission data in the range of 0-4.0 GPa.
